# Supplementary material for: Transcriptional Profiling Reveals Key Regulatory Roles of the WUSCHEL-Related Homeobox Gene Family in Yellowhorn (Xanthoceras sorbifolia Bunge)
Source: MDPI journal article supplement (doi:10.3390/f15020376), 2024-02-18
Supplement: s1 [file s1]

**Table S1.** The primer sequences of XsWOX genes for qRT-PCR.

| Gene Name | Forward Primer (5'-3')      | Reverse Primer(5'-3')        |
|-----------|-----------------------------|------------------------------|
| XsWOX1    | TCTGTTGGTGATGCGAATG         | GCAGGAGAAGTTGTGAACCC         |
| XsWOX3    | AGAGAAAGCAATCGGGTGT<br>AG   | CGCTGGAGTATCAAATGACT<br>G    |
| XsWOX4    | GCTTCATTAGACCCGAAAG<br>TG   | TCTGTTCTTGCGTTGGATTC         |
| XsWOX5    | GATGGAATGGGAGAATCA<br>GG    | CAAATGGTGGCATAGACAGC         |
| XsWOX6    | ATCCTACACTCTGTTTGGC<br>AAC  | ACTCTGGTCGGGTTTGATG          |
| XsWOX8    | TACAAAGGTGCTGCTTCCT<br>G    | TGTTCTTCTCCGTAGATTCCT<br>G   |
| XsWOX9    | GAATCCGACGACAGAACA<br>AG    | GTTGATACTTTGCGACGCTT         |
| XsACTIN   | ACGTCACACTGGAGTGATG<br>GTTG | TGGGTTGAGAGGTGCTTCAG<br>TAAG |

**Table S2.** Expression profiles of XsWOX genes in different developmental stages.

| Gene Name | S1      | S2      | S3      |
|-----------|---------|---------|---------|
| XsWOX1    | 72.7167 | 48.5833 | 16.38   |
| XsWOX2    | 0.08    | 0.01667 | 0.02333 |
| XsWOX3    | 30.1867 | 10.26   | 8.09667 |
| XsWOX4    | 179.307 | 207.35  | 11.6933 |
| XsWOX5    | 101.573 | 56.5267 | 47.32   |
| XsWOX6    | 0.88    | 0       | 0.02333 |
| XsWOX7    | 0.02667 | 0       | 0       |
| XsWOX8    | 0.43667 | 0       | 0       |
| XsWOX9    | 8.90333 | 0.32333 | 2.58333 |

**Table S3.** Expression profiles of XsWOX genes in different organs.

| Gene Name | flower  | fruit   | leaf    | stem    | root    |
|-----------|---------|---------|---------|---------|---------|
| XsWOX1    | 0       | 0       | 0       | 0       | 0.81523 |
| XsWOX2    | 0       | 7.79208 | 0       | 0       | 0       |
| XsWOX3    | 0.02408 | 0.3433  | 0.2783  | 0.73841 | 2.27798 |
| XsWOX4    | 0.00276 | 0.03258 | 0.03448 | 3.13913 | 1.16227 |
| XsWOX5    | 11.642  | 7.33328 | 4.11997 | 35.9625 | 22.0795 |
| XsWOX6    | 0       | 0.13364 | 0       | 0       | 0       |
| XsWOX7    | 0       | 1.87977 | 0       | 0.09537 | 0       |
| XsWOX8    | 0.03368 | 0.05473 | 0       | 0       | 0       |
| XsWOX9    | 0.03368 | 0.05473 | 0       | 0       | 0       |

**Table S4.** Expression profiles of XsWOX genes under salt and saline-alkali stress.

| Gene Name | control | ST_4h   | ST_24h  | AT_4h   | AT_24h  |
|-----------|---------|---------|---------|---------|---------|
| XsWOX1    | 4.09426 | 2.43885 | 0.71517 | 1.61584 | 0.63122 |
| XsWOX2    | 0       | 0       | 0       | 0       | 0       |
| XsWOX3    | 0.1171  | 0.07314 | 0.15842 | 0.06002 | 0.04145 |
| XsWOX4    | 0.15999 | 0.1862  | 0.01286 | 0.01541 | 0.01092 |
| XsWOX5    | 14.6239 | 16.6947 | 5.8067  | 15.9758 | 7.29136 |
| XsWOX6    | 0       | 0       | 0       | 0       | 0       |
| XsWOX7    | 0       | 0.01801 | 0       | 0       | 0       |
| XsWOX8    | 0       | 0       | 0       | 0.00471 | 0.17664 |
| XsWOX9    | 0       | 0       | 0       | 0.00471 | 0.17664 |

**Table S5.** Expression profiles of XsWOX genes under cold stress.

| Gene Name | LT_0h   | LT_4h   | LT_12h  | LT_24h  |
|-----------|---------|---------|---------|---------|
| XsWOX1    | 0       | 0       | 0       | 0       |
| XsWOX2    | 0       | 0       | 0       | 0       |
| XsWOX3    | 0.18004 | 0.18575 | 0.30302 | 0.10947 |
| XsWOX4    | 0.01313 | 0.00659 | 0.01306 | 0.0374  |
| XsWOX5    | 5.35944 | 4.37186 | 2.61284 | 1.25856 |
| XsWOX6    | 0       | 0       | 0       | 0       |
| XsWOX7    | 0       | 0.02439 | 0       | 0       |
| XsWOX8    | 0       | 0       | 0       | 0.00676 |
| XsWOX9    | 0       | 0       | 0       | 0.00676 |
